# Supplementary material for: Ten-Eleven Translocation 1 and 2 Enzymes Affect Human Skin Fibroblasts in an Age-Related Manner
Source: MDPI journal article supplement (doi:10.3390/biomedicines11061659), 2023-06-07
Supplement: s1 [file s1]

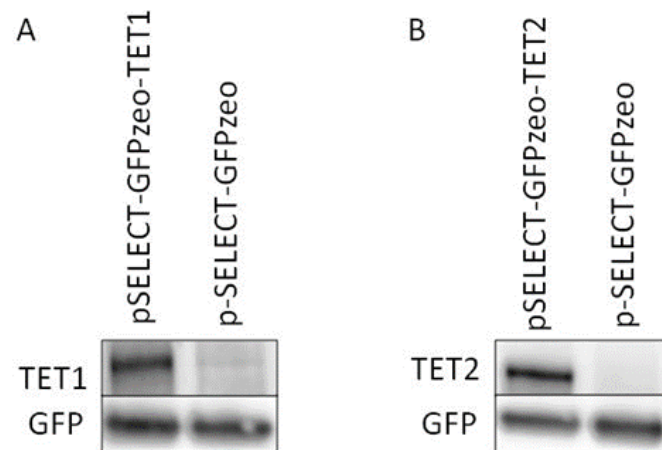

**Figure S1.** TET1 and TET2 expression in HEK293 cells transfected with pSELECT-GFPzeo-TET1 and pSELECT-GFPzeo-TET2 vectors. Cells transfected with “empty” pSELECT-GFPzeo vector served as a control. A. TET1. B. TET2.

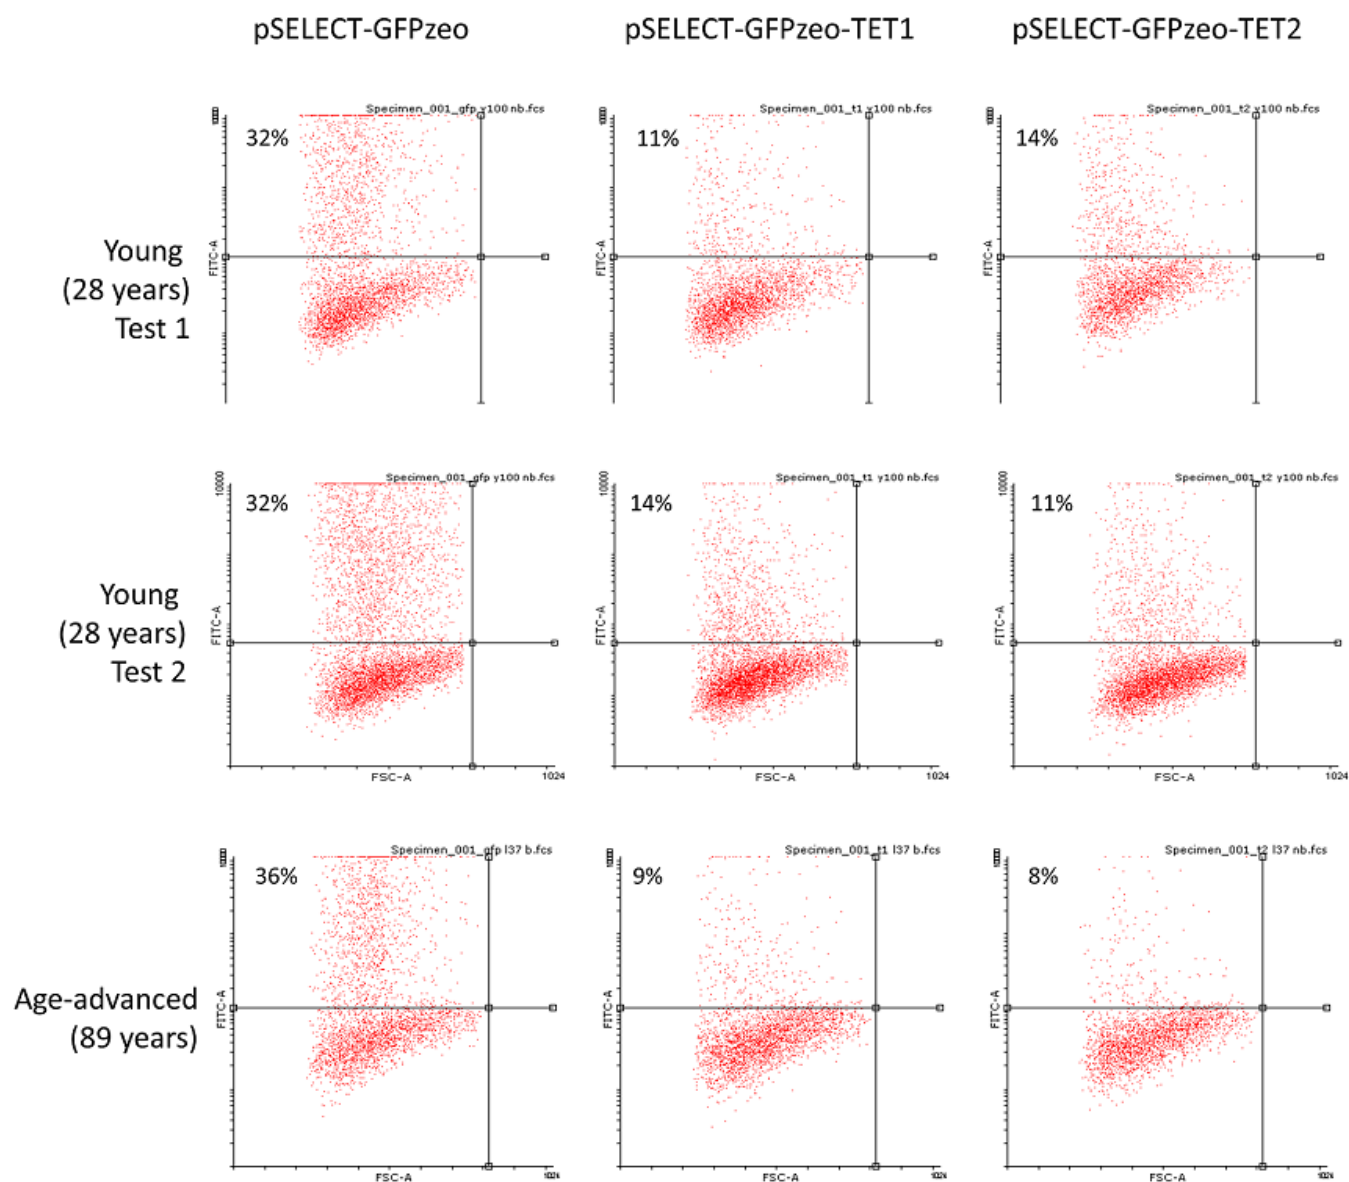

**Figure S2.** Representative flow cytometry plots showing the percentage of GFP-positive cells successfully transfected with pSELECT-GFPzeo control vector and pSELECT-GFPzeo-TET1 and pSELECT-GFPzeo-TET2 vector.
